# Supplementary material for: Effects of Strong Acidic Electrolyzed Water in Wound Healing via Inflammatory and Oxidative Stress Response
Source: Hindawi journal article supplement (doi:10.1155/2020/2459826), 2020-12-12
Supplement: f1 [file 2459826.f1.pdf]

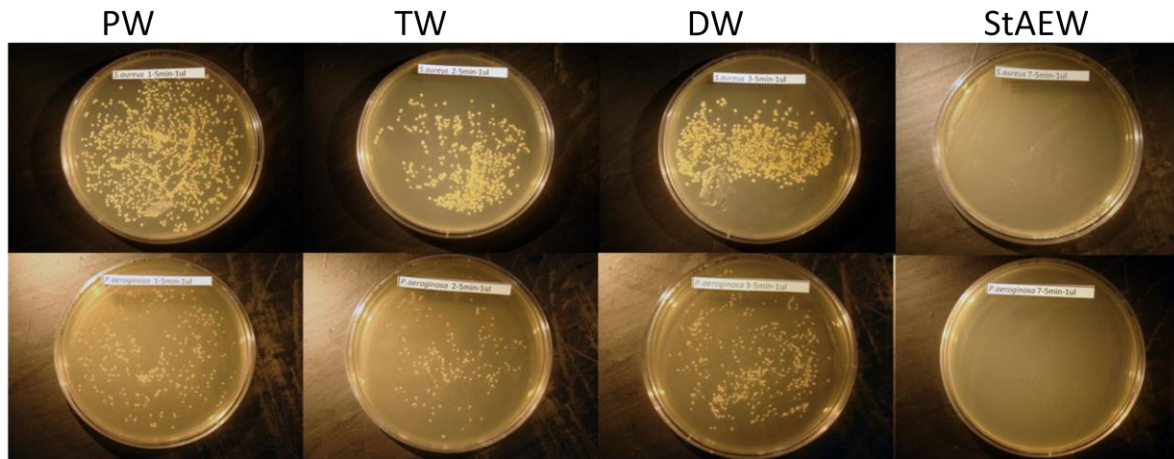

**Supplementary Figure 1.** *Staphylococcus aureus* (A) and *Pseudomonas aeruginosa* (B)-culture treated with different kinds of water. PW: purified water; TW: tap water; DW: distilled water; StAEW: strong acidic electrolyzed water
